# Supplementary material for: Solvent-free synthesis of Cu2ZnSnS4 nanocrystals: a facile, green, up-scalable route for low cost photovoltaic cells
Source: Royal Society of Chemistry journal article supplement (doi:10.1039/c4nr02564d), 2014-01-01
Supplement: c4nr02564d1.pdf [file c4nr02564d1.pdf]

## Electronic Supplementary Information for

### Solvent-Free Synthesis of $\text{Cu}_2\text{ZnSnS}_4$ Nanocrystals: A Facile, Green, Up-scalable Route for Low Cost Photovoltaic Cells†

Bo-In Park,<sup>‡ab</sup> Yoonjung Hwang,<sup>‡cd</sup> Seung Yong Lee,<sup>a</sup> Jae-Seung Lee,<sup>b</sup> Jong-Ku Park,<sup>a</sup> Jeunghyun Jeong,<sup>c</sup> Jin Young Kim,<sup>c</sup> BongSoo Kim,<sup>c</sup> So-Hye Cho,<sup>\*a</sup> and Doh-Kwon Lee<sup>\*cd</sup>

<sup>a</sup> Center for Materials Architecturing, Korea Institute of Science and Technology (KIST), Seoul 136-791, Korea. E-mail: sohyec@kist.re.kr

<sup>b</sup> Department of materials Science and Engineering, Korea University, Seoul 136-701, Korea

<sup>c</sup> Photo-electronic Hybrids Research Center, Korea Institute of Science and Technology (KIST), Seoul 136-791, Korea, E-mail: dklee@kist.re.kr

<sup>d</sup> Department of Nanomaterials Science and Engineering, Korea University of Science and Technology, Daejeon 305-350, Korea

‡ These authors equally contributed to this work.

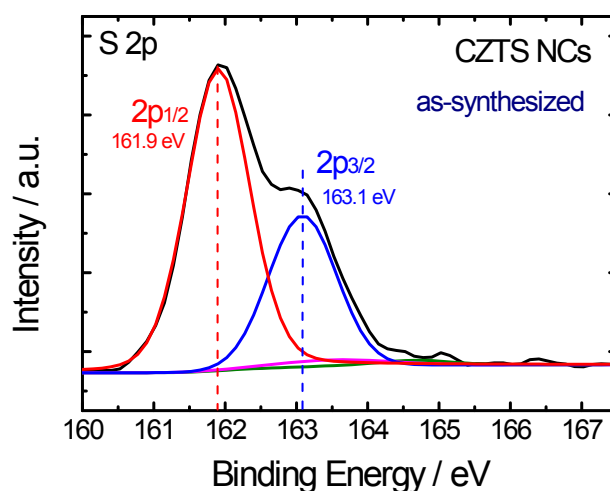

**Fig. S1.** XPS spectrum for S 2p of the as-synthesized  $\text{Cu}_2\text{ZnSnS}_4$  nanocrystals (NCs). Note that the as-synthesized CZTS NCs are free from the oxidized species such as sulfates.

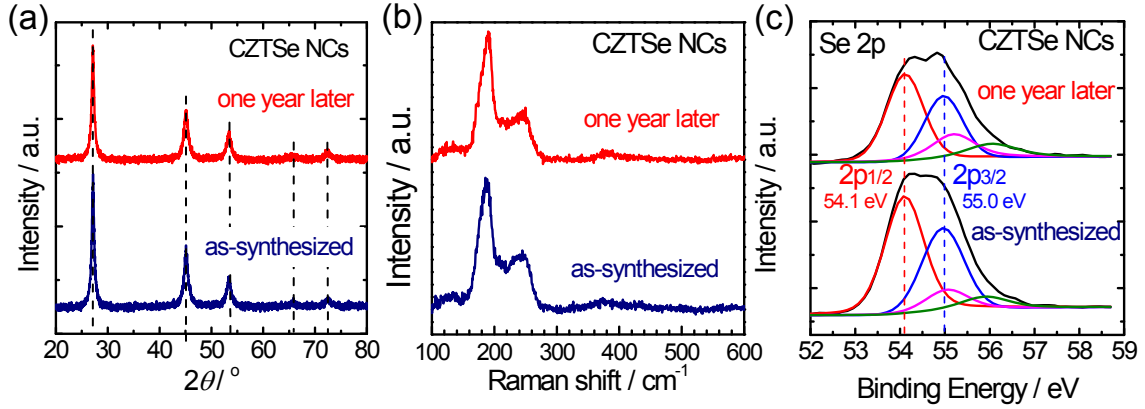

**Fig. S2.** Characterizations of  $\text{Cu}_2\text{ZnSnSe}_4$  NCs immediately after the synthesis and after being stored on a bench top for one year: (a) XRD patterns, (b) Raman spectra, and (c) XPS spectra for Se 2p.

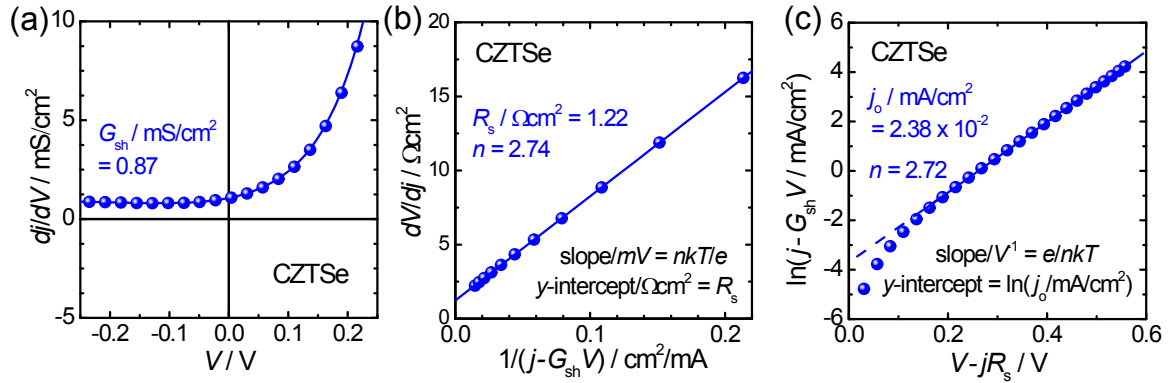

**Fig. S3.** A diode analysis on the  $\text{Cu}_2\text{ZnSnSe}_4$  solar cell: (a) a plot of  $dj/dV$  vs.  $V$ , where  $G_{\text{sh}}$  was extracted from the plateau value assuming that a linear shunt current predominates the diode current in the range of  $V < 0$ , (b) a plot of  $dV/dj$  vs.  $1/(j - G_{\text{sh}}V)$ , where  $R_s$  and  $n$  were evaluated from the y-intercept and the slope, respectively, in the high bias regime, and (c) a semi-logarithmic plot of  $(j - G_{\text{sh}}V)$  vs.  $V - jR_s$  for determination of  $n$  and  $j_0$ . The ideality factor ( $n$ ) is determined in part b and c, respectively. Note that both values are in good agreement, thus supporting the validity of this analysis.

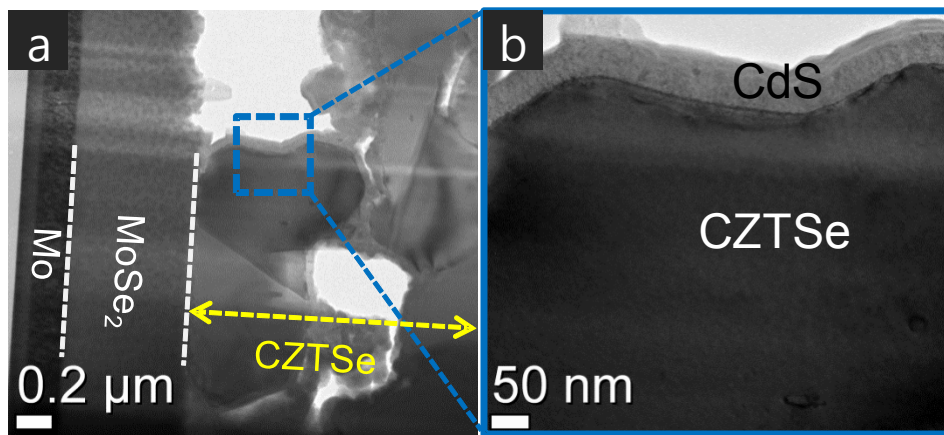

**Fig. S4.** TEM cross sectional images of the  $\text{Cu}_2\text{ZnSnSe}_4$  solar cell with low (a) and high (a) magnification.
